# Supplementary material
Source: publisher figshare collection journal article supplement (https://frontiersin.figshare.com/ndownloader/files/22724507)

|         |            |            |           |       |
|---------|------------|------------|-----------|-------|
|         |            |            | Bone mets |       |
|         |            | Brain mets |           | 2.423 |
|         | Liver mets |            | 2.11      | 5.287 |
| DL mets |            | 3.093      | 2.185     | 3.013 |

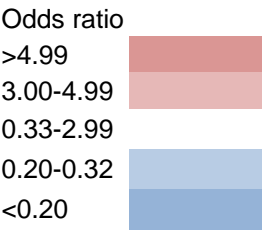

Supplement: Supplementary file [file 22724507]
